# Supplementary material for: Effects of first- and third-person perspectives created using a head-mounted display on dart-throwing accuracy
Source: Research Square preprint supplement (doi:10.21203/rs.3.rs-564416/v1), 2021-05-27
Supplement: Supplementary file 1 [file bc1a55e8110d18aeabdd41b3.xlsx]

## Sheet: 1PP
Subject	Dominant hand	Trials	1	2	3	4	5	6	7	8	9	10	11	12	13	14	15	16	17	18	19	20	21	22	23	24	25	26	27	28	29	30	31	32	33	34	35	36	37	38	39	40	41	42	43	44	45	46	47
1	Right	Absolute error [mm]	55	87.5	50	57.5	67.5	42.5	87.5	12.5	90	7.5	80	20	50	40	60	117.5	85	47.5	75	55	72.5	162.5	65	115	50	102.5	32.5	65	25	47.5	67.5	57.5	47.5	87.5	17.5	55	85	65	20	87.5	45	135	77.5	15	85	92.5	100
2	Right	Absolute error [mm]	55	40	30	55	12.5	12.5	52.5	45	107.5	120	45	40	37.5	47.5	47.5	12.5	15	30	25	85	37.5	17.5	35	60	67.5	65	62.5	25	52.5	60	95	60	25	75	25	77.5	55	145	42.5	132.5	65	72.5	65	72.5	62.5	47.5	45
3	Right	Absolute error [mm]	47.5	47.5	55	155	52.5	80	115	55	160	65	20	20	187.5	60	87.5	45	25	90	95	50	102.5	150	140	85	35	135	140	92.5	102.5	170	92.5	107.5	135	82.5	152.5	20	95	70	60	65	67.5	180	35	212.5	20	90	115
4	Right	Absolute error [mm]	45	80	20	45	80	42.5	127.5	55	25	95	55	25	25	50	55	42.5	45	20	35	7.5	175	100	102.5	60	102.5	27.5	90	107.5	102.5	85	110	77.5	107.5	50	7.5	15	145	50	165	75	115	45	75	37.5	50	27.5	37.5
5	Left	Absolute error [mm]	75	35	117.5	70	55	92.5	47.5	117.5	137.5	30	80	110	67.5	55	60	65	60	50	25	52.5	32.5	160	150	100	100	87.5	65	117.5	185	150	65	95	135	72.5	120	212.5	105	25	142.5	90	77.5	112.5	90	110	85	45	60
6	Left	Absolute error [mm]	25	65	80	175	17.5	85	90	45	100	85	105	82.5	17.5	72.5	85	77.5	50	45	45	75	167.5	52.5	155	65	145	195	135	120	180	97.5	150	97.5	135	160	145	102.5	230	205	125	42.5	115	97.5	15	55	102.5	65	35
7	Right	Absolute error [mm]	55	90	60	75	65	115	25	25	120	172.5	85	60	17.5	70	150	50	35	40	75	165	95	100	170	55	87.5	120	20	142.5	190	125	125	55	135	85	45	145	67.5	85	100	12.5	100	115	137.5	102.5	15	130	35
8	Right	Absolute error [mm]	20	37.5	117.5	80	25	35	25	90	45	62.5	55	92.5	25	90	5	12.5	75	40	37.5	25	70	17.5	95	40	55	70	75	90	115	65	47.5	52.5	45	95	145	157.5	57.5	125	85	115	102.5	80	67.5	52.5	85	85	107.5
9	Left	Absolute error [mm]	17.5	35	30	70	85	20	100	35	45	40	5	45	30	75	75	22.5	37.5	50	70	22.5	35	55	80	97.5	55	12.5	135	55	17.5	52.5	90	35	45	37.5	75	45	25	30	70	75	37.5	12.5	55	65	45	35	35
10	Right	Absolute error [mm]	35	20	62.5	42.5	20	42.5	40	45	85	52.5	55	40	47.5	60	12.5	25	72.5	102.5	37.5	20	87.5	70	90	40	70	85	35	92.5	75	140	30	70	102.5	100	57.5	85	7.5	62.5	80	55	47.5	77.5	40	20	57.5	110	102.5
11	Right	Absolute error [mm]	75	75	35	107.5	75	90	55	47.5	35	75	95	50	30	57.5	40	47.5	47.5	75	47.5	62.5	45	115	145	37.5	45	75	37.5	55	60	57.5	45	40	97.5	130	45	37.5	100	32.5	67.5	95	NaN	170	77.5	77.5	20	67.5	130
12	Left	Absolute error [mm]	57.5	77.5	55	60	27.5	27.5	32.5	32.5	37.5	72.5	55	75	65	90	62.5	2.5	85	35	45	32.5	112.5	95	145	187.5	82.5	20	100	127.5	95	97.5	25	95	165	77.5	95	95	42.5	32.5	17.5	107.5	75	42.5	42.5	47.5	40	50	67.5
13	Right	Absolute error [mm]	25	57.5	45	95	7.5	55	65	30	35	25	57.5	55	60	65	55	82.5	30	55	45	120	255	165	135	120	35	80	92.5	150	5	75	45	17.5	32.5	45	55	55	95	120	112.5	100	92.5	190	75	102.5	7.5	17.5	25
14	Right	Absolute error [mm]	50	57.5	47.5	52.5	45	50	17.5	60	60	37.5	12.5	55	135	25	30	32.5	27.5	70	50	62.5	90	32.5	117.5	77.5	20	35	95	77.5	25	20	120	87.5	85	40	92.5	120	35	127.5	47.5	85	115	42.5	52.5	42.5	45	100	67.5
15	Right	Absolute error [mm]	55	55	70	15	67.5	75	27.5	70	55	35	65	90	45	55	65	92.5	55	20	45	47.5	215	57.5	185	100	152.5	115	85	60	117.5	175	77.5	25	117.5	47.5	95	190	90	62.5	80	45	35	112.5	65	35	50	72.5	67.5
16	Right	Absolute error [mm]	65	50	115	60	55	20	80	35	25	45	70	55	40	62.5	142.5	12.5	85	32.5	20	25	100	92.5	65	57.5	40	80	102.5	45	32.5	62.5	20	110	2.5	32.5	17.5	55	15	45	35	42.5	37.5	30	40	102.5	70	70	45
17	Right	Absolute error [mm]	115	112.5	112.5	25	42.5	115	165	60	55	65	112.5	110	45	67.5	92.5	17.5	27.5	100	70	137.5	40	172.5	97.5	230	85	182.5	170	230	217.5	230	230	157.5	160	107.5	210	145	137.5	115	25	230	45	20	120	132.5	155	132.5	135
18	Right	Absolute error [mm]	72.5	215	45	42.5	20	152.5	57.5	132.5	55	67.5	65	65	120	122.5	55	35	77.5	85	77.5	27.5	230	107.5	85	120	70	165	42.5	80	35	40	152.5	65	35	32.5	30	32.5	20	15	167.5	70	45	112.5	75	170	77.5	90	45
19	Right	Absolute error [mm]	95	35	100	135	135	135	57.5	102.5	40	75	120	55	15	15	20	45	37.5	32.5	100	165	22.5	82.5	42.5	170	162.5	85	60	32.5	82.5	85	52.5	70	52.5	67.5	132.5	152.5	82.5	15	45	85	72.5	65	5	115	95	62.5	102.5
20	Right	Absolute error [mm]	45	95	7.5	55	65	30	35	25	57.5	55	60	65	55	82.5	30	55	45	120	52.5	25	85	110	65	45	152.5	75	35	80	42.5	80	145	90	27.5	15	12.5	65	45	42.5	30	97.5	95	25	37.5	77.5	82.5	120	25
[truncated: 13 more columns]

## Sheet: 3PP
Subject	Dominant hand	Trials	1	2	3	4	5	6	7	8	9	10	11	12	13	14	15	16	17	18	19	20	21	22	23	24	25	26	27	28	29	30	31	32	33	34	35	36	37	38	39	40	41	42	43	44	45	46	47
1	Right	Absolute error [mm]	30	35	45	25	55	35	20	50	20	67.5	47.5	12.5	12.5	50	42.5	37.5	42.5	45	30	15	215	50	152.5	7.5	27.5	42.5	102.5	65	100	70	67.5	45	170	60	45	100	20	72.5	52.5	65	17.5	67.5	55	77.5	20	20	70
2	Right	Absolute error [mm]	70	7.5	45	130	35	117.5	75	45	25	80	47.5	35	25	137.5	115	12.5	7.5	35	45	20	NaN	215	225	NaN	170	95	32.5	205	75	17.5	87.5	85	90	182.5	95	162.5	62.5	60	NaN	105	20	72.5	5	15	20	95	95
3	Right	Absolute error [mm]	20	115	72.5	120	150	40	87.5	25	40	45	45	50	102.5	155	102.5	77.5	90	80	75	90		100	17.5	210	40	45	120	55	57.5	NaN	155	155	145	172.5	155	127.5	135	NaN	NaN	140	115	75	20	45	25	95	55
4	Right	Absolute error [mm]	7.5	37.5	7.5	7.5	30	35	7.5	35	45	65	7.5	25	20	75	17.5	50	50	25	35	15	45	15	75	45	25	40	52.5	45	20	60	95	47.5	100	75	97.5	42.5	117.5	65	32.5	7.5	55	55	35	35	47.5	52.5	25
5	Right	Absolute error [mm]	105	55	62.5	75	75	92.5	45	45	120	80	120	100	82.5	85	45	82.5	65	82.5	115	52.5	NaN	NaN	135	55	165	NaN	NaN	95	67.5	70	40	85	192.5	155	75	82.5	62.5	215	120	55	95	47.5	100	77.5	80	85	100
6	Right	Absolute error [mm]	67.5	67.5	85	65	50	145	55	85	5	87.5	52.5	55	50	82.5	12.5	32.5	42.5	25	65	50	NaN	NaN	185	NaN	140	120	225	105	125	30	150	NaN	115	135	NaN	175	117.5	32.5	145	NaN	85	70	125	12.5	27.5	132.5	20
7	Left	Absolute error [mm]	97.5	37.5	40	70	92.5	175	117.5	137.5	127.5	37.5	20	50	75	37.5	67.5	80	35	95	32.5	192.5	NaN	NaN	NaN	NaN	NaN	NaN	NaN	205	70	95	192.5	185	NaN	NaN	155	130	75	55	117.5	125	135	60	75	120	20	70	50
8	Right	Absolute error [mm]	50	85	45	85	0	40	35	55	70	35	55	67.5	20	50	25	35	37.5	32.5	40	25	165	95	55	NaN	110	110	135	27.5	95	57.5	35	95	52.5	NaN	85	52.5	100	110	115	95	75	20	82.5	55	52.5	57.5	20
9	Right	Absolute error [mm]	85	92.5	90	85	35	185	35	140	15	25	25	62.5	37.5	25	37.5	42.5	107.5	87.5	205	102.5	25	120	55	145	130	157.5	25	140	25	65	80	12.5	200	182.5	92.5	140	NaN	170	105	160	65	85	100	80	25	95	40
10	Right	Absolute error [mm]	92.5	25	40	12.5	40	77.5	60	85	32.5	107.5	102.5	17.5	85	102.5	90	55	32.5	27.5	75	20	NaN	NaN	150	75	82.5	220	115	65	102.5	102.5	47.5	35	135	130	20	35	52.5	135	102.5	55	87.5	65	107.5	70	20	125	60
11	Right	Absolute error [mm]	52.5	115	55	40	75	65	65	120	125	60	55	67.5	30	67.5	100	80	82.5	115	115	155	NaN	115	NaN	85	NaN	92.5	87.5	127.5	145	132.5	45	47.5	77.5	20	77.5	45	120	30	35	115	50	85	45	55	45	60	72.5
12	Right	Absolute error [mm]	72.5	25	62.5	117.5	45	35	30	50	45	65	165	35	15	35	75	47.5	30	77.5	55	30	200	NaN	117.5	NaN	185	112.5	NaN	225	140	62.5	155	NaN	145	62.5	117.5	135	107.5	45	115	80	35	80	85	40	112.5	130	135
13	Right	Absolute error [mm]	50	70	30	77.5	40	85	112.5	45	37.5	45	65	65	52.5	35	35	50	42.5	55	95	80		127.5	165	85	85	127.5	45	25	65	65	35	65	55	120	40	155	152.5	77.5	77.5	100	55	20	12.5	52.5	75	85	35
14	Left	Absolute error [mm]	65	62.5	27.5	27.5	62.5	50	90	45	20	42.5	55	62.5	35	35	60	72.5	65	17.5	55	45	95	32.5	90	105	67.5	75	35	145	160	80	110	185	35	40	120	35	80	52.5	145	35	65	100	72.5	25	70	32.5	30
15	Right	Absolute error [mm]	25	55	25	65	25	52.5	72.5	37.5	12.5	15	40	25	45	30	35	55	25	65	67.5	75	NaN	NaN	200	120	110	120	85	70	62.5	102.5	85	127.5	37.5	130	180	NaN	NaN	177.5	100	NaN	20	30	20	50	82.5	45	67.5
16	Right	Absolute error [mm]	110	37.5	85	55	125	37.5	72.5	57.5	35	110	7.5	15	125	47.5	32.5	100	45	27.5	97.5	125	NaN	110	NaN	172.5	NaN	225	70	17.5	NaN	192.5	60	NaN	NaN	90	107.5	185	180	180	197.5	117.5	47.5	45	40	55	35	55	25
17	Right	Absolute error [mm]	65	47.5	42.5	75	77.5	50	60	25	17.5	32.5	35	40	40	60	40	15	35	65	20	97.5	47.5	107.5	25	45	170	97.5	215	152.5	87.5	15	110	77.5	55	82.5	135	85	85	85	112.5	62.5	125	75	125	15	27.5	30	60
18	Right	Absolute error [mm]	115	97.5	95	65	75	57.5	17.5	62.5	95	142.5	55	120	62.5	10	7.5	35	105	52.5	47.5	30	135	152.5	95	150	137.5	85	35	87.5	82.5	100	140	195	115	210	50	215	NaN	130	52.5	135	95	25	45	45	77.5	45	25
19	Right	Absolute error [mm]	110	82.5	105	110	62.5	52.5	160	75	90	45	67.5	7.5	35	50	77.5	140	112.5	135	35	30	NaN	185	200	107.5	100	137.5	100	75	65	155	NaN	45	67.5	190	142.5	120	150	145	117.5	135	185	35	115	165	100	45	57.5
20	Right	Absolute error [mm]	107.5	67.5	67.5	77.5	185	72.5	130	NaN	32.5	60	35	35	30	95	107.5	55	NaN	55	102.5	NaN	185	150	95	NaN	190	195	152.5	162.5	140	NaN	82.5	187.5	NaN	65	NaN	100	25	127.5	115	27.5	180	52.5	25	82.5	5	165	77.5
[truncated: 13 more columns]

## Sheet: perception exp
Subject No.	Turn	Distance [m]	1PP						3PP
	Eyesight		Perceived distance [steps]	Cube size [mm]					Perceived distance [steps]	Cube size [mm]
	Height [m]			50	60	70	85	100		50	60	70	85	100
1	1pp->3pp	0.8	2	50	50	60	75	90	1.5	60	70	80	100	125
	20/20	1.6	3.5	50	65	80	100	125	3.3	50	70	75	100	120
	1.65	2.4	6	40	50	55	70	120	5	50	70	65	90	105
2	3pp->1pp	0.8	1	45	55	60	70	90	0.5	50	70	80	90	100
	20/13	1.6	2	40	60	65	80	105	2.5	40	50	80	90	110
	1.82	2.4	3.5	50	70	70	75	100	3.5	50	55	80	80	90
3	1pp->3pp	0.8	1	55	65	90	95	110	1	50	70	75	100	100
	20/25	1.6	2	55	75	75	90	100	2.5	50	65	70	80	100
	1.7	2.4	4	60	75	70	90	105	4	45	55	75	85	95
4	3pp->1pp	0.8	0.4	55	70	75	85	100	0.5	60	75	80	100	125
	20/20	1.6	1.8	45	75	85	100	115	1.7	80	85	90	105	115
	1.74	2.4	4	55	55	70	85	100	5.5	55	60	80	95	100
5	3pp->1pp	0.8	1	45	60	70	75	90	1	50	65	85	105	100
	20/20	1.6	3	50	55	70	90	100	2	55	55	65	75	100
	1.76	2.4	5	60	75	80	95	105	4	45	70	85	100	110
6	3pp->1pp	0.8	1	40	45	50	60	85	1	70	80	85	100	110
	20/25	1.6	2.5	60	65	80	90	120	3.5	60	40	60	90	110
	1.65	2.4	5	50	70	75	85	105	6	50	55	60	85	90
7	1pp->3pp	0.8	1	65	75	80	95	100	1	60	80	80	100	110
	20/20	1.6	2.5	55	70	80	90	100	3	55	70	70	85	100
	1.69	2.4	5.5	70	80	85	95	105	5.5	60	65	75	100	100
8	3pp->1pp	0.8	0.8	50	65	65	80	90	0.9	50	65	70	80	100
	20/40	1.6	3	50	60	65	70	90	3	50	55	60	80	90
	1.7	2.4	4.2	65	60	70	75	95	4.5	50	50	65	80	70
9	1pp->3pp	0.8	0.8	45	65	60	95	115	0.8	60	70	80	90	110
	20/40	1.6	2.7	70	70	80	110	100	3	50	70	75	95	110
	170	2.4	4	35	50	60	80	110	5.7	50	55	75	85	100
10	3pp->1pp	0.8	1.5	60	75	70	85	110	2	65	90	95	100	110
	20/13	1.6	5	60	75	80	85	100	4	60	85	95	85	110
	175	2.4	8	50	80	70	85	110	7	65	70	75	90	100
